# Supplementary material for: Smart Nanofiber Mesh with Locally Sustained Drug Release Enabled Synergistic Combination Therapy for Glioblastoma
Source: MDPI journal article supplement (doi:10.3390/nano13030414), 2023-01-19
Supplement: s1 [file s1]

## Smart Nanofiber Mesh with Locally Sustained Drug Release Enabled Synergistic Combination Therapy for Glioblastoma

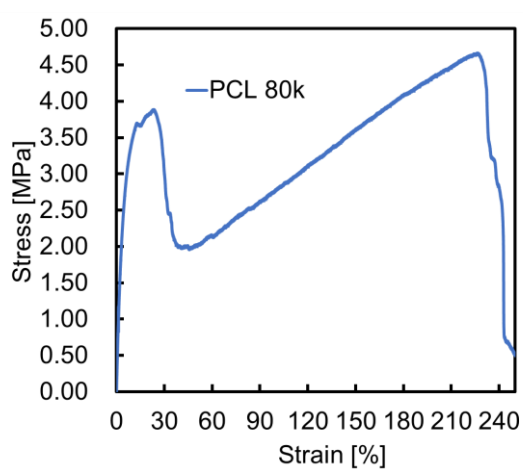

**Figure S1.** Mechanical property of PCL 80k NFM measured by tensile test.

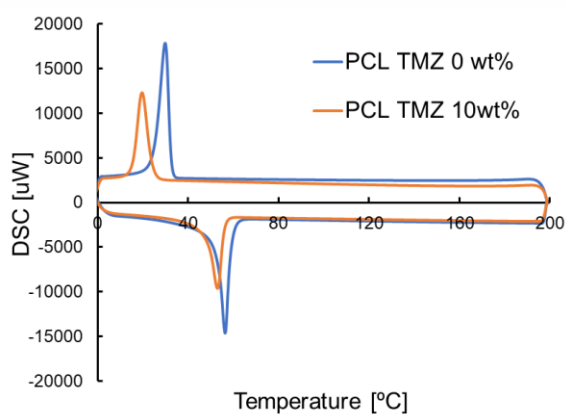

**Figure S2.** Thermal properties of PCL nanofibers before and after the addition of drugs by measuring DSC.
